# Supplementary material
Source: PubMed Central journal article supplement (PMC3764853)
Supplement: bph0170-0101-SD2.pdf [file bph0170-0101-SD2.pdf]

**A structural chemogenomics analysis of aminergic GPCRs: lessons for histamine receptor ligand design**

A.J. Kooistra<sup>#</sup>, S. Kuhne<sup>#</sup>, I.J.P. de Esch, R. Leurs, C. de Graaf<sup>\*</sup>

Division of Medicinal Chemistry, Faculty of Sciences, Amsterdam Institute for Molecules, Medicines and Systems (AIMMS), VU University Amsterdam, De Boelelaan 1083, 1081 HV Amsterdam, The Netherlands

<sup>#</sup>These authors contributed equally

<sup>\*</sup>E-mail address corresponding author: c.de.graaf@vu.nl

*Running title: Structural chemogenomics analysis of aminergic GPCRs*

## **Supporting Information**

**Table S1.** Binding affinities from site directed mutagenesis studies on histamine receptors and crystallized aminergic GPCRs (see separate excel file). The 2D structures of all the compounds are depicted in Figures 3 and S7. The single-letter amino acid codes indicated in the grey rows are the human wild-type residues. <sup>a</sup>SDM study on guinea pig H<sub>1</sub>R. <sup>b</sup>Only functional SDM data available for histamine (**8**) in H<sub>2</sub>R. <sup>c</sup>SDM study on rat M<sub>3</sub>R.

**Table S2.** Aminergic GPCR crystal structures available in the PDB

|                        | <b>Resolution</b> | <b>Release date</b> | <b>PubMed ID</b> |
|------------------------|-------------------|---------------------|------------------|
| <b>M<sub>2</sub>R</b>  |                   |                     |                  |
| <b>3UON</b>            | 3.0               | 2012-02-01          | 22278061         |
| <b>M<sub>3</sub>R</b>  |                   |                     |                  |
| <b>4DAJ</b>            | 3.4               | 2012-02-22          | 22358844         |
| <b>β<sub>1</sub>AR</b> |                   |                     |                  |
| <b>2VT4</b>            | 2.7               | 2008-06-24          | 18594507         |
| <b>2Y00</b>            | 2.5               | 2011-01-12          | 21228877         |
| <b>2Y01</b>            | 2.6               | 2011-03-30          | 21228877         |
| <b>2Y02</b>            | 2.6               | 2011-01-12          | 21228877         |
| <b>2Y03</b>            | 2.9               | 2011-01-12          | 21228877         |
| <b>2Y04</b>            | 3.1               | 2011-01-12          | 21228877         |
| <b>2YCW</b>            | 3.0               | 2011-06-01          | 21540331         |
| <b>2YCX</b>            | 3.3               | 2011-06-01          | 21540331         |
| <b>2YCY</b>            | 3.2               | 2011-06-08          | 21540331         |
| <b>2YCZ</b>            | 3.7               | 2011-06-01          | 21540331         |
| <b>4AMI</b>            | 3.2               | 2012-05-23          | 22579251         |
| <b>4AMJ</b>            | 2.3               | 2012-05-23          | 22579251         |
| <b>4GPO</b>            | 3.5               | 2013-02-27          | 23435379         |
| <b>β<sub>2</sub>AR</b> |                   |                     |                  |
| <b>2R4R</b>            | 3.4               | 2007-11-06          | 17952055         |
| <b>2R4S</b>            | 3.4               | 2007-11-06          | 17952055         |
| <b>2RH1</b>            | 2.4               | 2007-10-30          | 17962520         |
| <b>3D4S</b>            | 2.8               | 2008-06-17          | 18547522         |
| <b>3KJ6</b>            | 3.4               | 2010-02-16          | 20054398         |
| <b>3NY8</b>            | 2.8               | 2010-08-11          | 20669948         |
| <b>3NY9</b>            | 2.8               | 2010-08-11          | 20669948         |
| <b>3NYA</b>            | 3.2               | 2010-08-11          | 20669948         |
| <b>3P0G</b>            | 3.5               | 2011-01-19          | 21228869         |
| <b>3PDS</b>            | 3.5               | 2011-01-12          | 21228876         |
| <b>3SN6</b>            | 3.2               | 2011-07-20          | 21772288         |
| <b>D<sub>3</sub>R</b>  |                   |                     |                  |
| <b>3PBL</b>            | 2.9               | 2010-11-03          | 21097933         |
| <b>H<sub>1</sub>R</b>  |                   |                     |                  |
| <b>3RZE</b>            | 3.1               | 2011-06-15          | 21697825         |

**Table S3.** The number of ligands for which the activity for both receptors is known (as annotated in the ChEMBL)

|                    | hH <sub>1</sub> R | hH <sub>2</sub> R | hH <sub>3</sub> R | hH <sub>4</sub> R | hM <sub>2</sub> R | hM <sub>3</sub> R | hβ <sub>1</sub> AR | hβ <sub>2</sub> AR | hD <sub>3</sub> R |
|--------------------|-------------------|-------------------|-------------------|-------------------|-------------------|-------------------|--------------------|--------------------|-------------------|
| hH <sub>1</sub> R  | -                 | 246               | 107               | 57                | 100               | 91                | 80                 | 78                 | 172               |
| hH <sub>2</sub> R  | 246               | -                 | 92                | 45                | 77                | 74                | 66                 | 66                 | 113               |
| hH <sub>3</sub> R  | 107               | 92                | -                 | 280               | 10                | 8                 | 4                  | 3                  | 18                |
| hH <sub>4</sub> R  | 57                | 45                | 280               | -                 | 5                 | 5                 | 5                  | 4                  | 6                 |
| hM <sub>2</sub> R  | 100               | 77                | 10                | 5                 | -                 | 789               | 83                 | 83                 | 121               |
| hM <sub>3</sub> R  | 91                | 74                | 8                 | 5                 | 789               | -                 | 84                 | 94                 | 111               |
| hβ <sub>1</sub> AR | 80                | 66                | 4                 | 5                 | 83                | 84                | -                  | 628                | 122               |
| hβ <sub>2</sub> AR | 78                | 66                | 3                 | 4                 | 83                | 94                | 628                | -                  | 116               |
| hD <sub>3</sub> R  | 172               | 113               | 18                | 6                 | 121               | 111               | 122                | 116                | -                 |

**Table S4.** The percentage (%) of the pairwise sequence identity between the TM domains of the histamine receptors as well as the aminergic receptors with a crystal structure available. The gradient from blue to white to red indicates a low to high sequence similarity.

|                    | hH <sub>1</sub> R | hH <sub>2</sub> R | hH <sub>3</sub> R | hH <sub>4</sub> R | hM <sub>2</sub> R | hM <sub>3</sub> R | rM <sub>3</sub> R | hβ <sub>1</sub> AR | mβ <sub>1</sub> AR | hβ <sub>2</sub> AR | hD <sub>3</sub> R |
|--------------------|-------------------|-------------------|-------------------|-------------------|-------------------|-------------------|-------------------|--------------------|--------------------|--------------------|-------------------|
| hH <sub>1</sub> R  | -                 | 34                | 31                | 29                | 36                | 36                | 37                | 33                 | 35                 | 33                 | 32                |
| hH <sub>2</sub> R  | 35                | -                 | 30                | 26                | 31                | 31                | 32                | 43                 | 42                 | 36                 | 38                |
| hH <sub>3</sub> R  | 31                | 30                | -                 | 50                | 32                | 34                | 34                | 34                 | 33                 | 27                 | 32                |
| hH <sub>4</sub> R  | 29                | 25                | 50                | -                 | 29                | 32                | 32                | 28                 | 28                 | 27                 | 31                |
| hM <sub>2</sub> R  | 37                | 31                | 32                | 29                | -                 | 68                | 67                | 29                 | 30                 | 29                 | 33                |
| hM <sub>3</sub> R  | 37                | 31                | 34                | 32                | 68                | -                 | 96                | 31                 | 32                 | 33                 | 32                |
| rM <sub>3</sub> R  | 37                | 32                | 34                | 32                | 67                | 96                | -                 | 32                 | 33                 | 34                 | 31                |
| hβ <sub>1</sub> AR | 33                | 43                | 34                | 28                | 29                | 31                | 31                | -                  | 84                 | 66                 | 39                |
| mβ <sub>1</sub> AR | 35                | 41                | 33                | 28                | 30                | 32                | 33                | 84                 | -                  | 66                 | 39                |
| hβ <sub>2</sub> AR | 33                | 36                | 27                | 27                | 29                | 33                | 34                | 66                 | 66                 | -                  | 36                |
| hD <sub>3</sub> R  | 33                | 38                | 32                | 31                | 33                | 31                | 31                | 39                 | 39                 | 36                 | -                 |

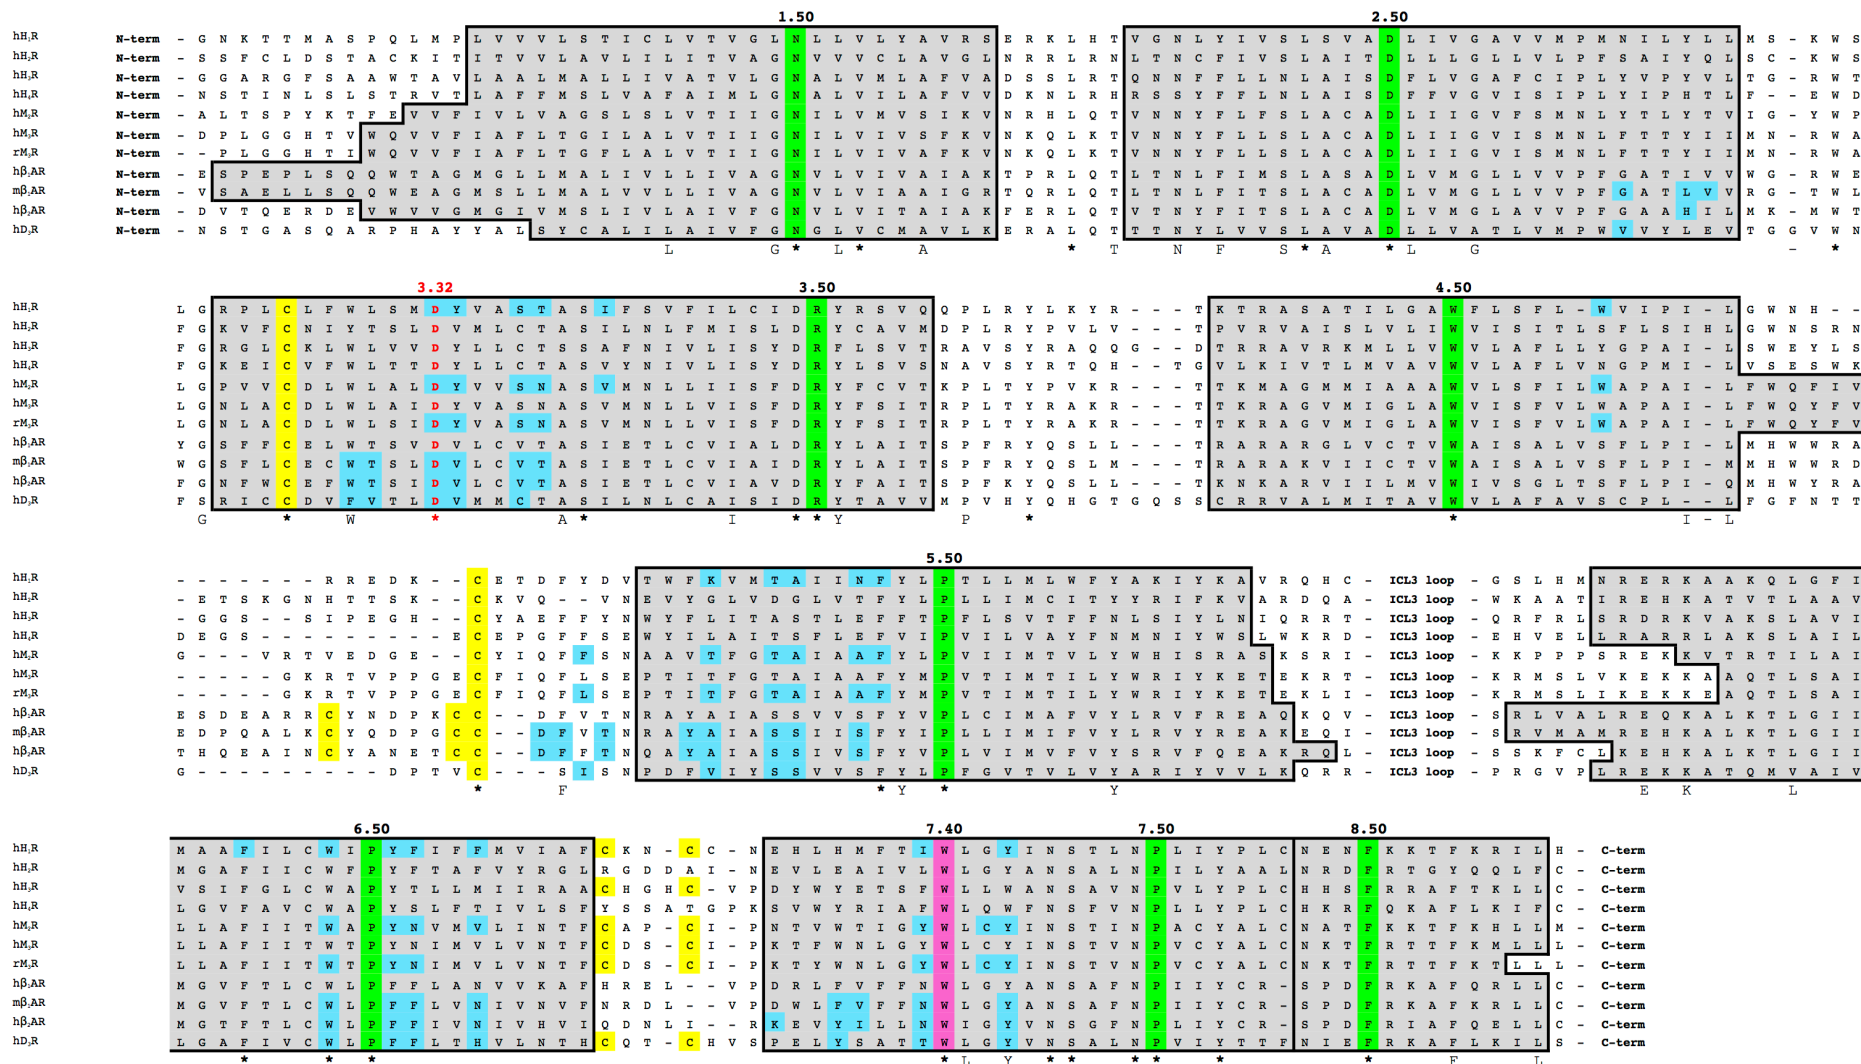

**Figure S1.** Full sequence alignment of the histamine and all crystallized aminergic GPCR receptors.

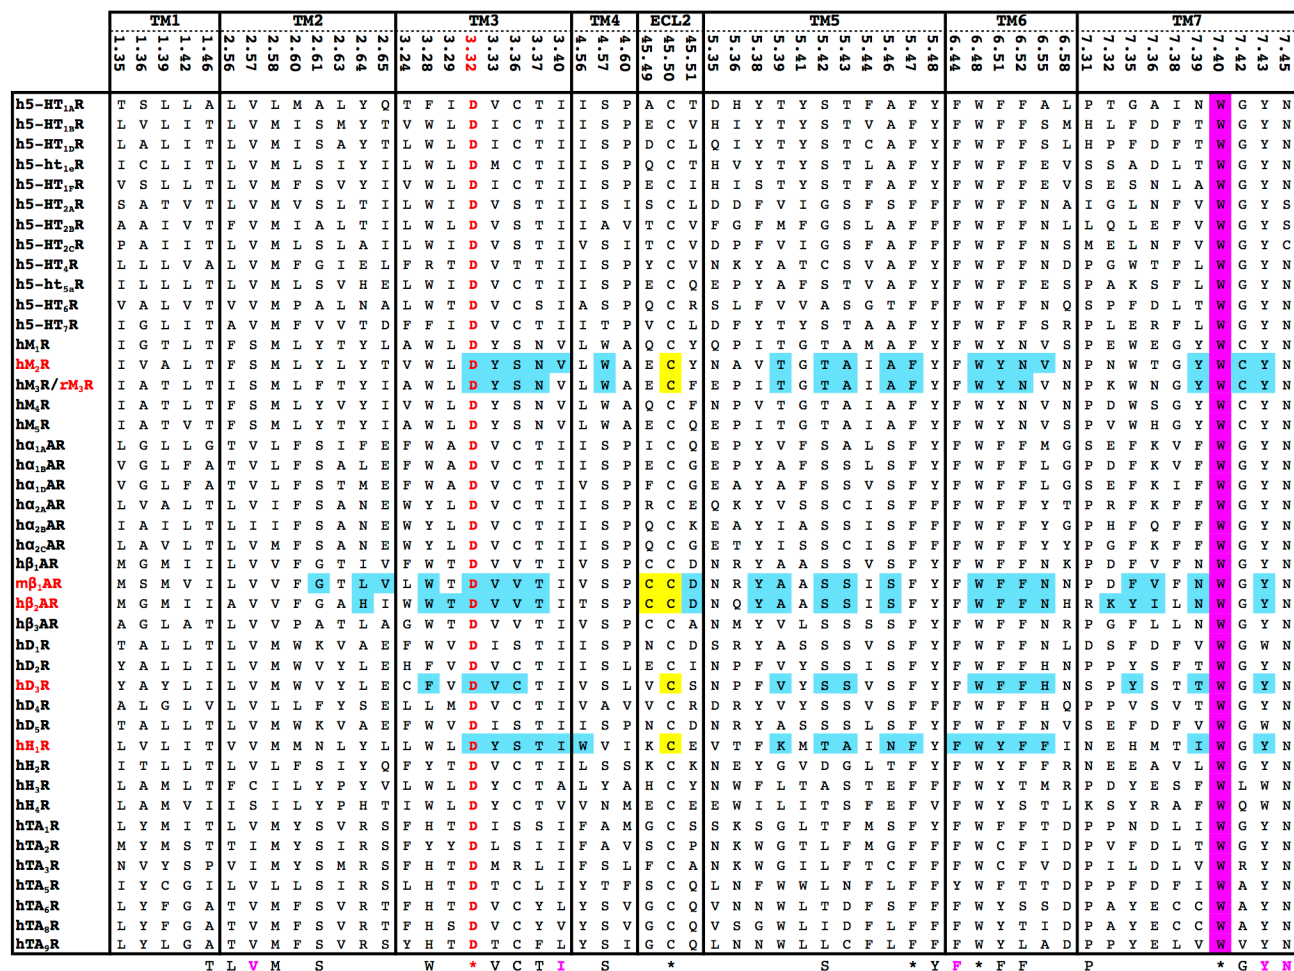

Figure S2. Sequence alignment of the selected pocket residues for all aminergic GPCR receptors.

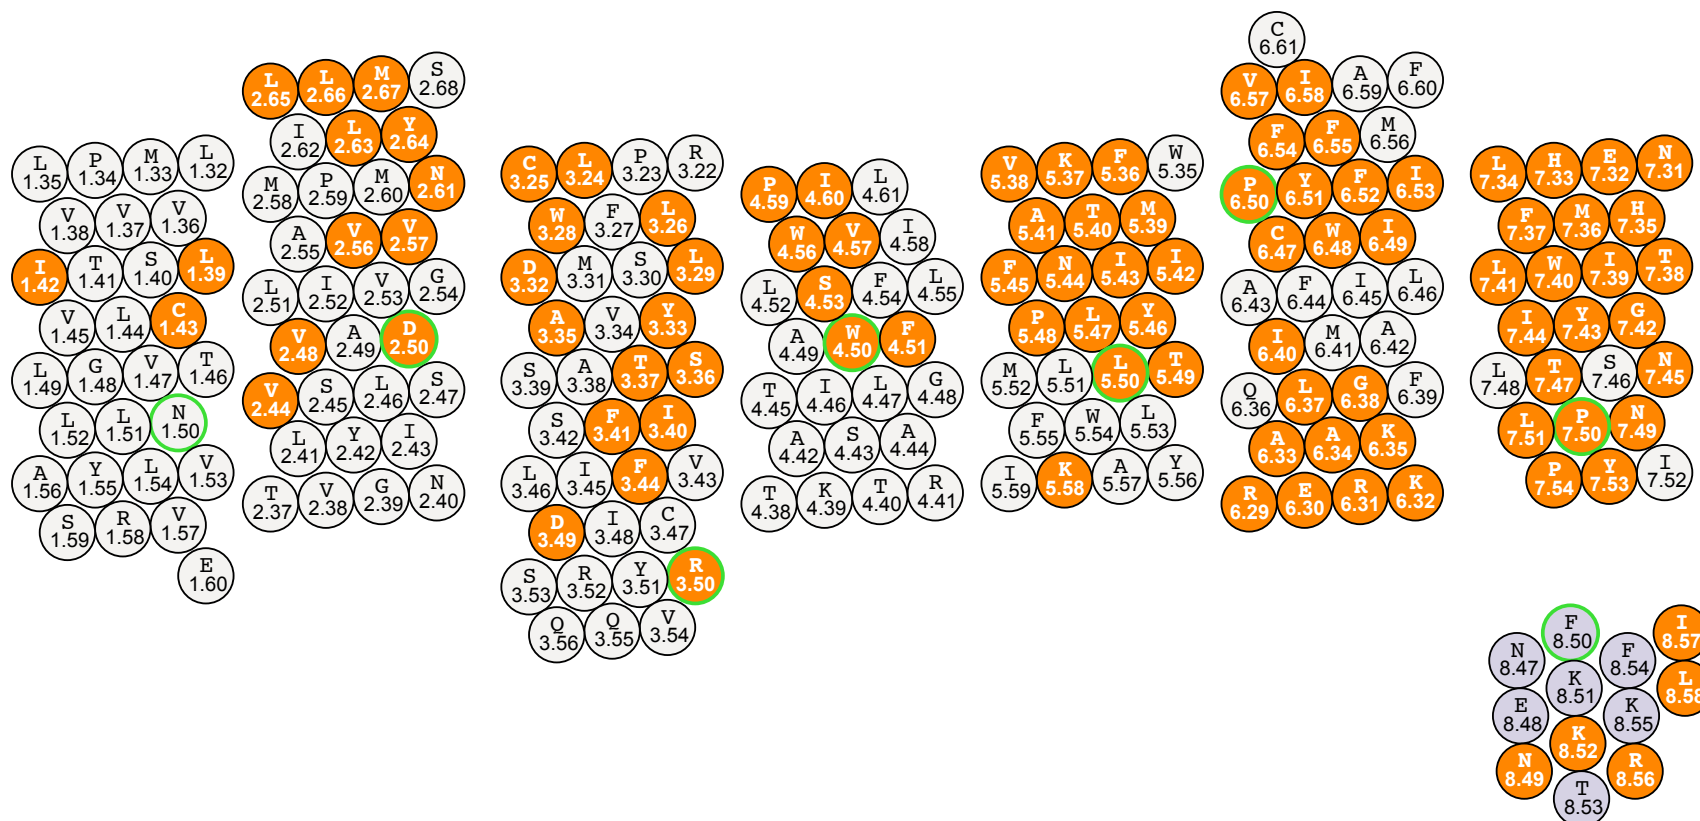

**Figure S3.** Snakeplot ([http://www.ssfa-7tmr.de/ssfe/snakes/snakes\\_designer.php](http://www.ssfa-7tmr.de/ssfe/snakes/snakes_designer.php)) showing the helices of H<sub>1</sub>R. All B&W numbers are given within the circles as well as the amino acids in H<sub>1</sub>R, all B&W positions within the TM helices that were mutated during single-point SDM studies for the aminergic GPCRs from SI Table 1 are shown in orange. The most conserved residues (i.e. the numbers as indicated by <TM>.50 in the Ballesteros-Weinstein numbering scheme) are circled in green.

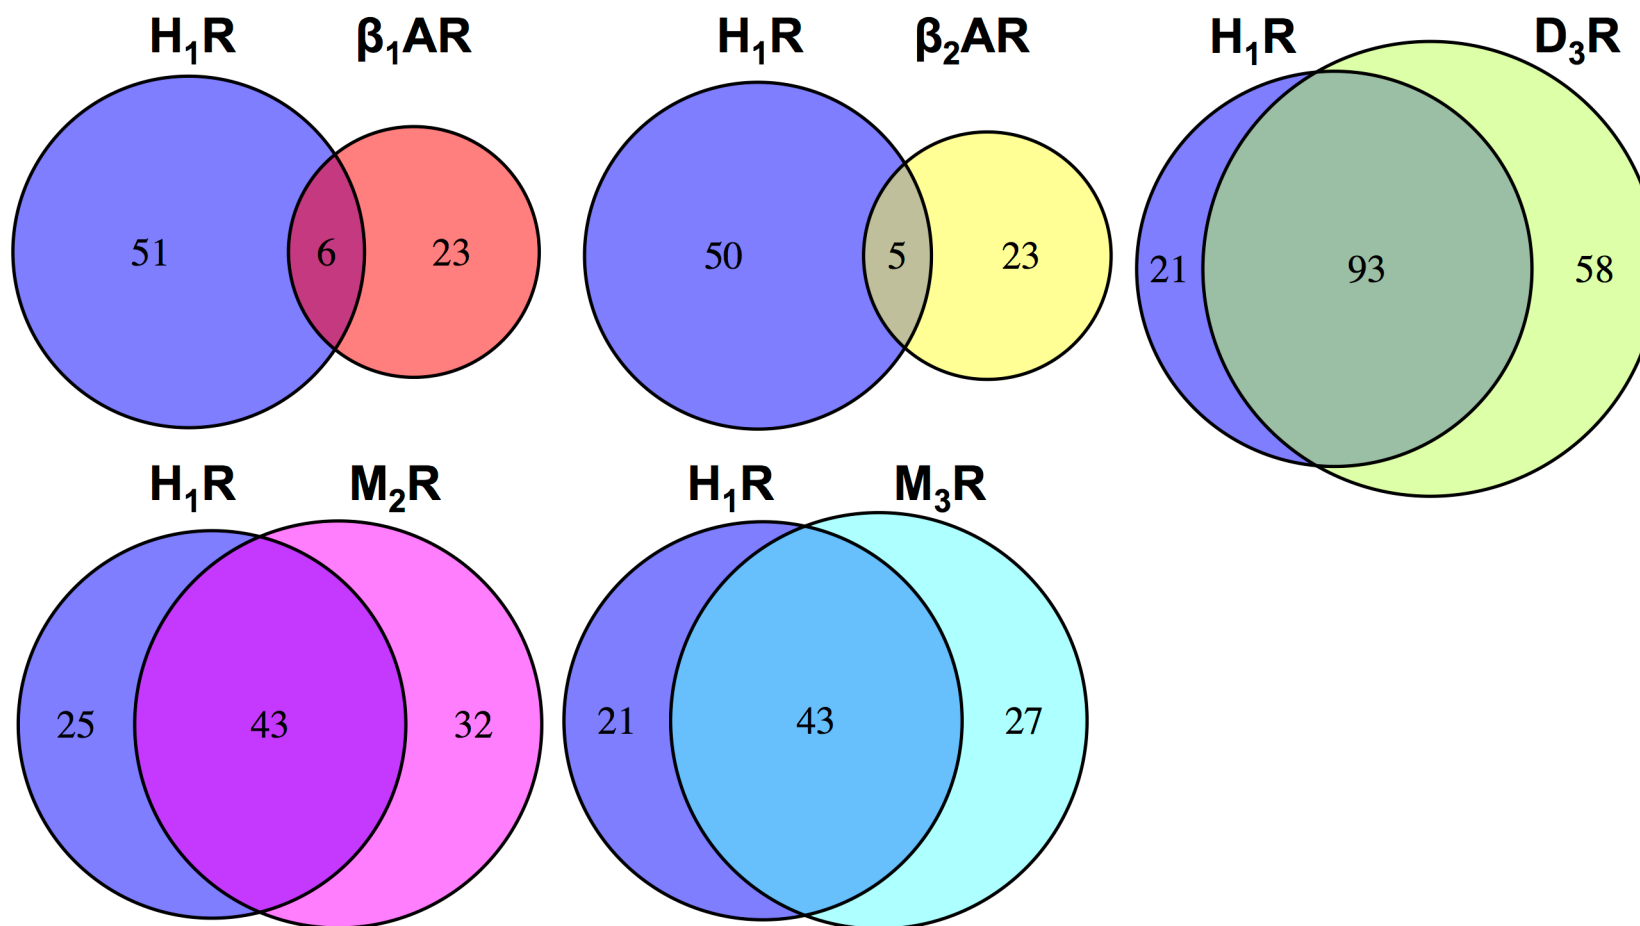

**Figure S4.** Venn diagram visualizing the overlap between the ligands of H<sub>1</sub>R and all crystallized GPCR receptors according to ligand binding data obtained from the ChEMBL.



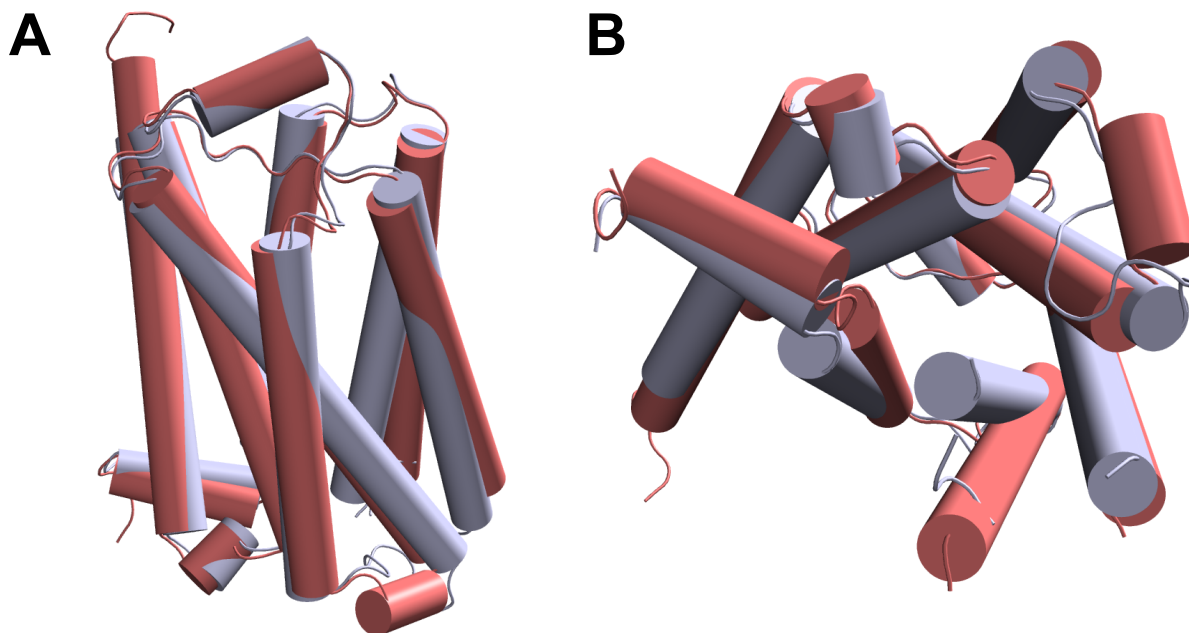

**Figure S5.** A) front and B) bottom view displaying the changes in the orientation of the TM helices of  $\beta_2$ AR upon activation. The structure of the inactive (PDB-code 2RH1) and active and (PDB-code 3P0G)  $\beta_2$ AR structure are shown in red and light blue respectively.

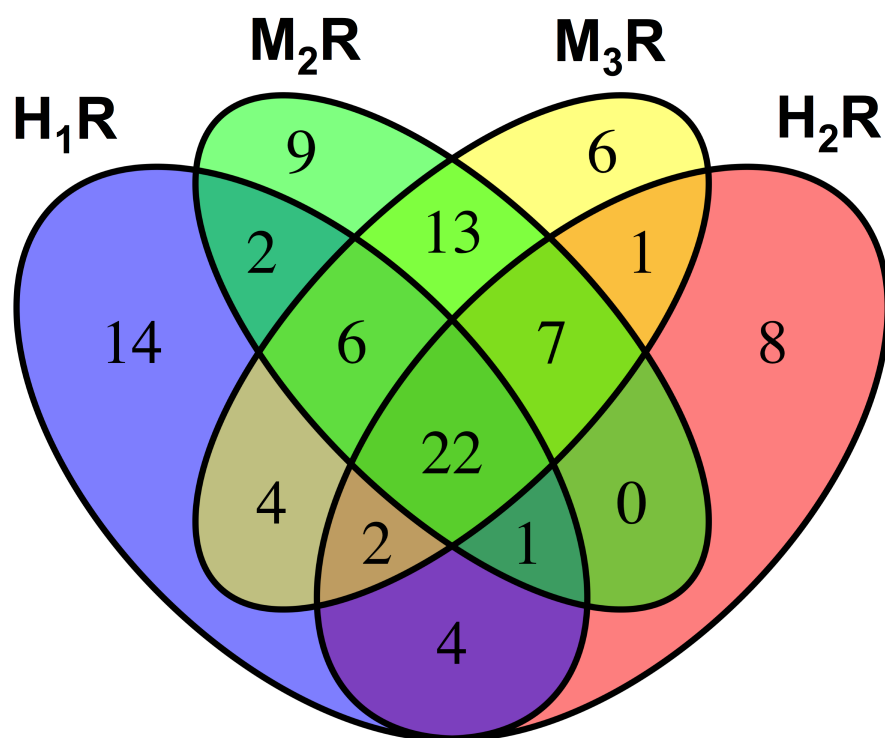

**Figure S6.** Venn diagram visualizing the overlap between the ligands of H<sub>1</sub>R, H<sub>2</sub>R, M<sub>2</sub>R and M<sub>3</sub>R.

**Figure S7.** 2D structures for most of the ligands for which SDM data is annotated in Table S1. The structures omitted here are depicted in Figure 3.

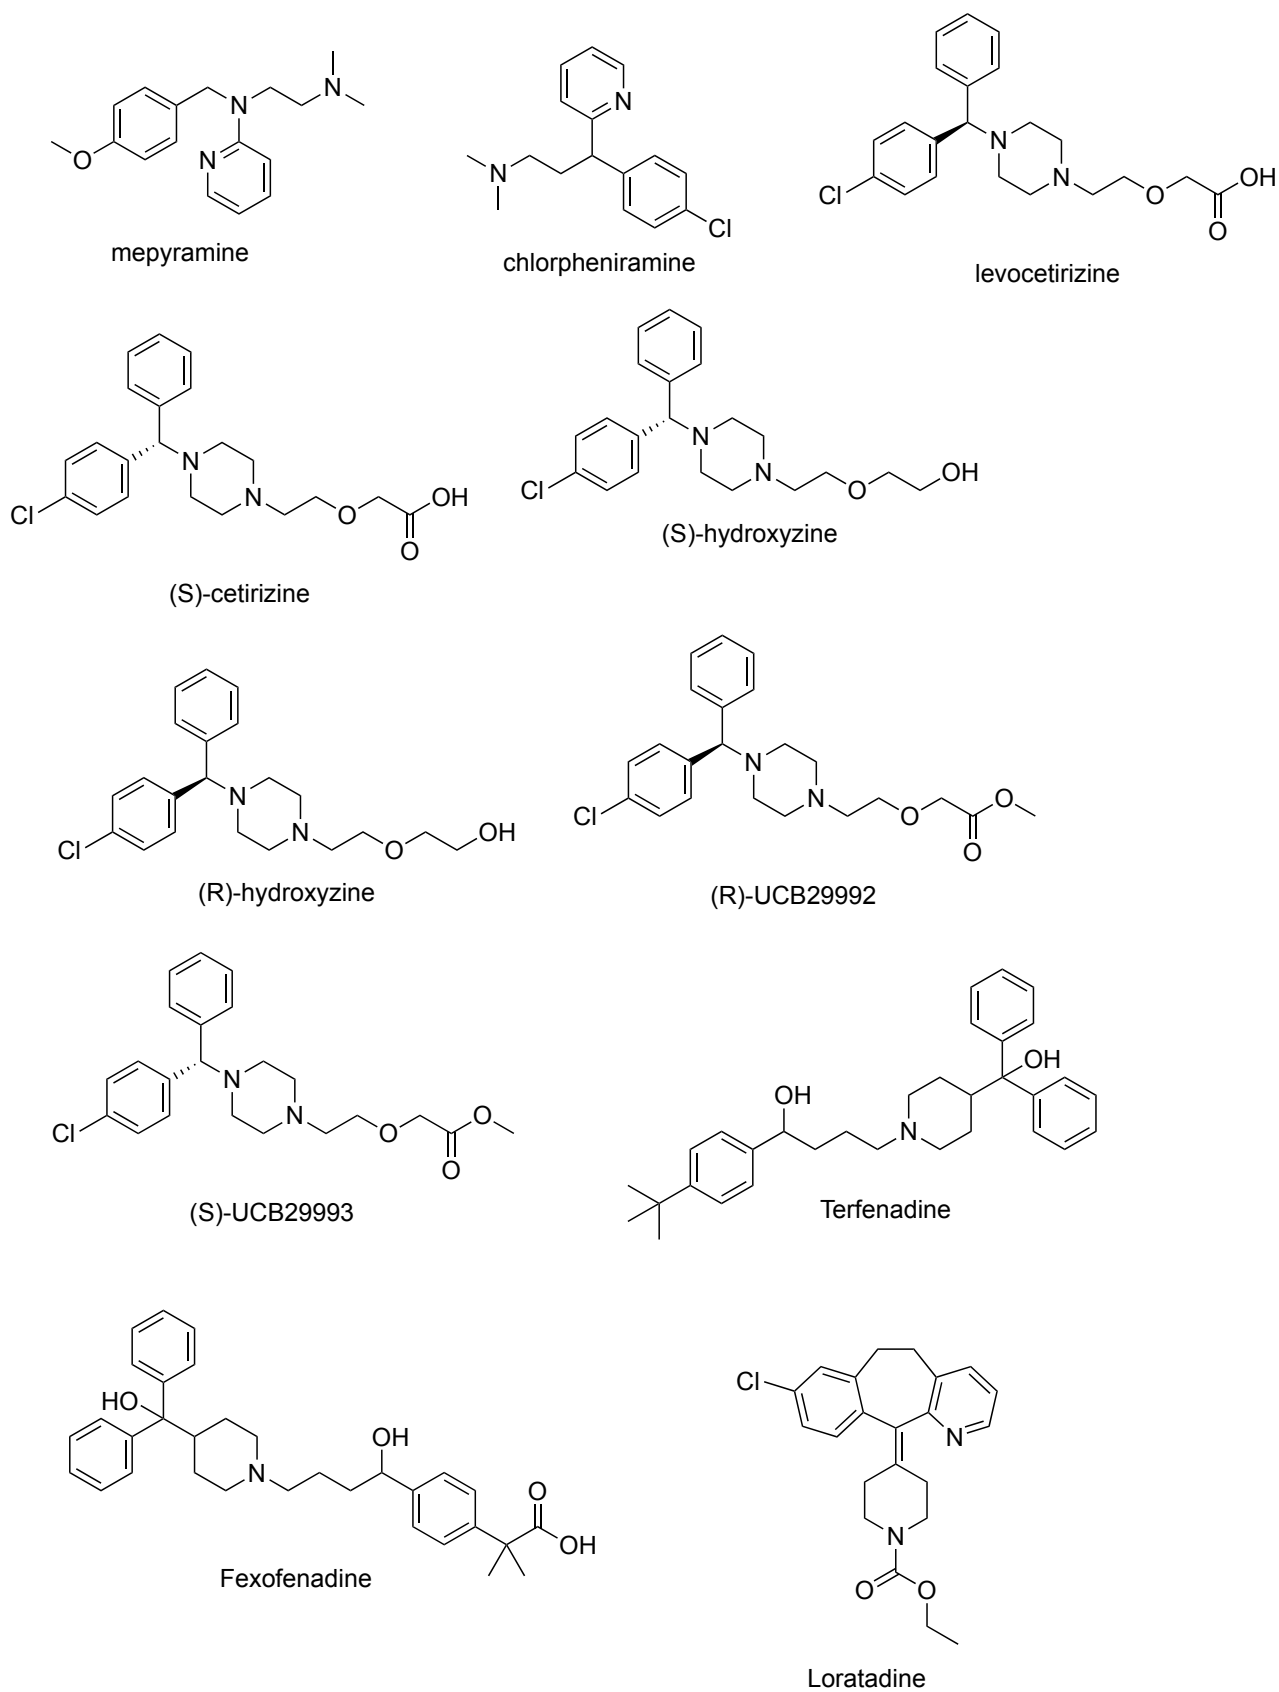

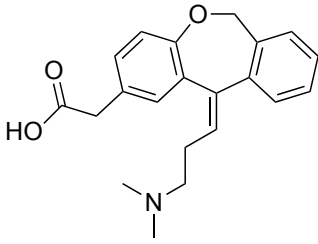

Olopatadine/KW-4679

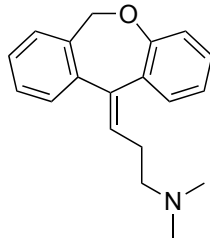

Doxepin

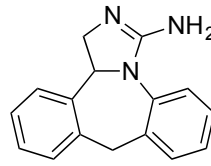

Epinastine

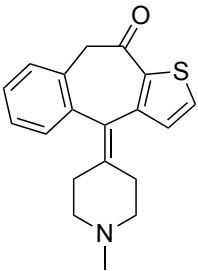

Ketotifen

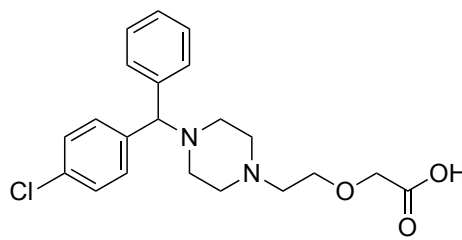

Cetirizine

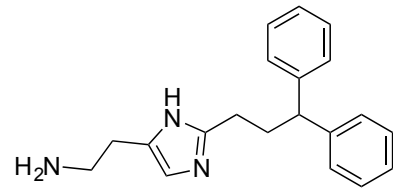

Histaprodifen

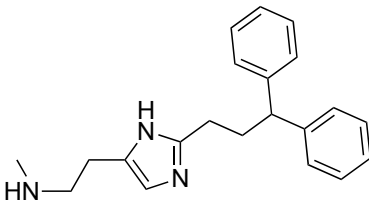

methylhistaprodifen

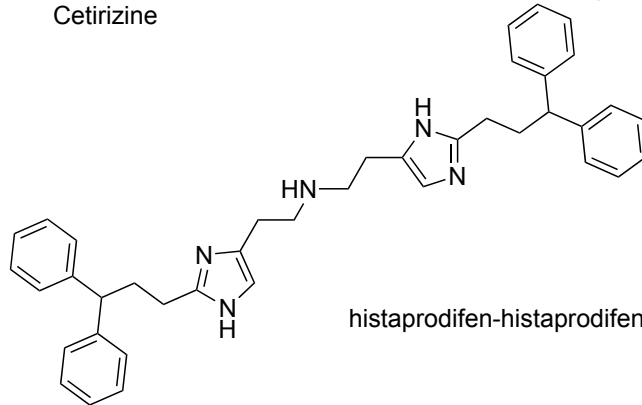

histaprodifen-histaprodifen

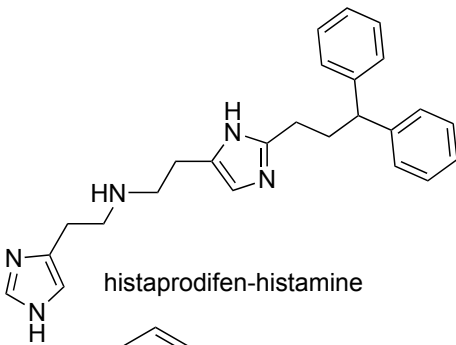

histaprodifen-histamine

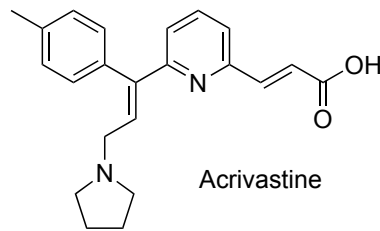

Acrivastine

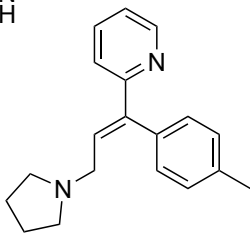

Triprolidine

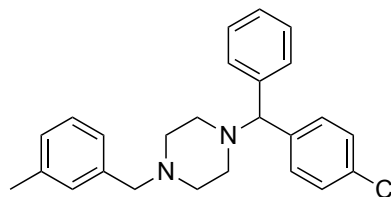

Meclozine

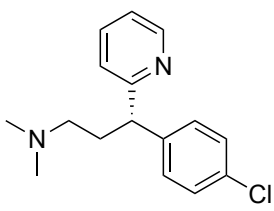

(S)-chlorpheniramine (D)

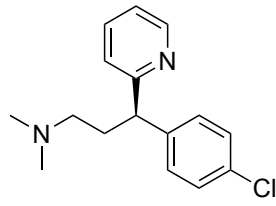

(R)-chlorpheniramine (L)

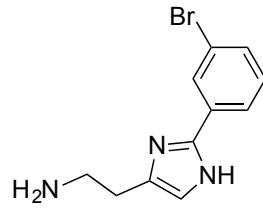

2-(3-bromophenyl)histamine

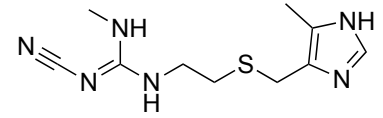

Cimetidine

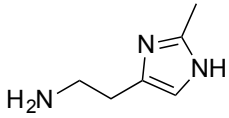

2-methylhistamine

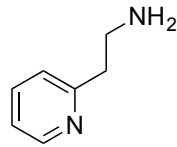

2-pyridylethylamine

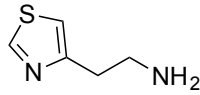

2-thiazolylthethylamine

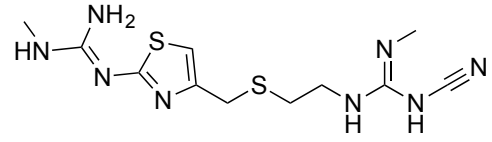

methyltiotidine

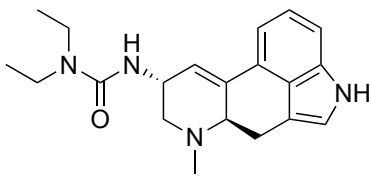

8R-Lisuride

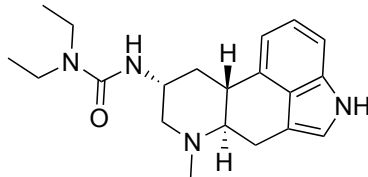

8R-Terguride

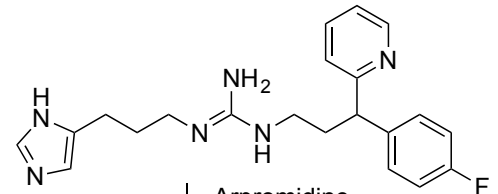

Arpmidine

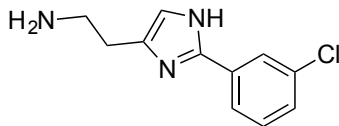

2-(3-chlorophenyl)histamine

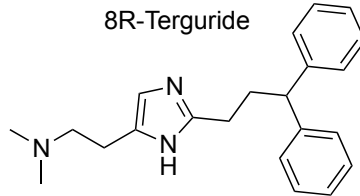

dimethylhistaprodifen

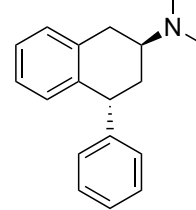

(2S,4R)-PAT

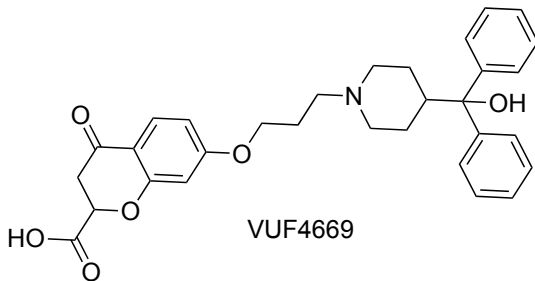

VUF4669

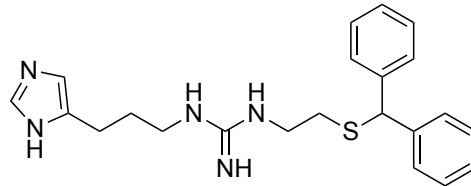

VUF8401

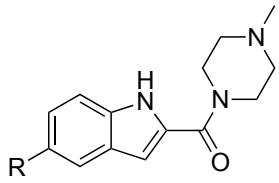

R = H (paper-1a, Schultes et al., 2012)  
R = Cl (JNJ7777120)

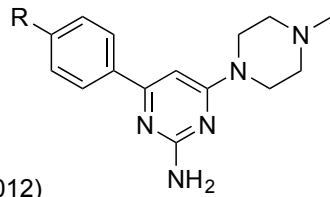

R = H (paper-2a, Schultes et al., 2012)  
R = Cl (paper-2b, Schultes et al., 2012)

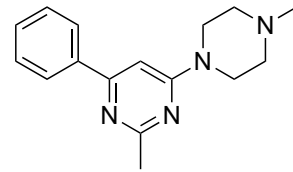

VUF14481

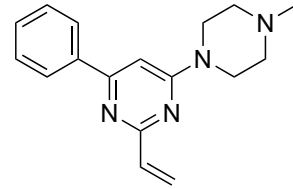

VUF14480

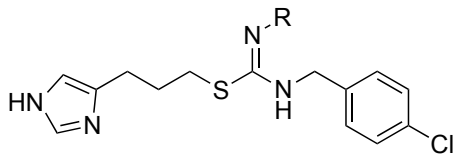

R = H (Clobenpropit)  
R = cyclohexyl (VUF5228)

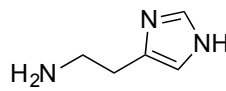

histamine

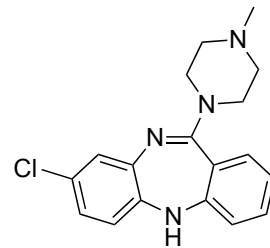

Clozapine

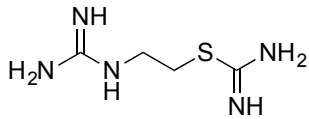

VUF8430

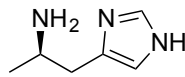

R-aphamethylhistamine

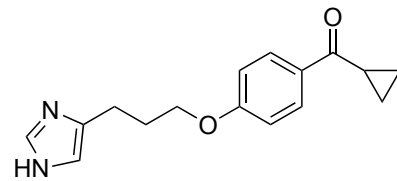

Ciproxyfan

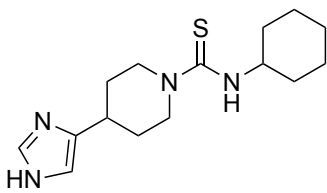

Thioperamide

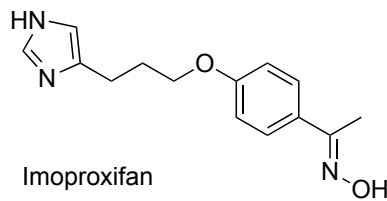

Imoproxifan

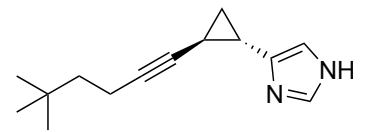

GT-2331

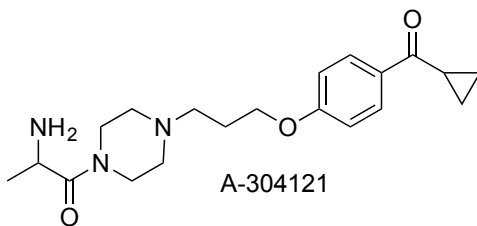

A-304121

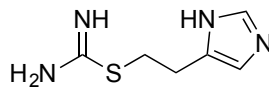

Imetit

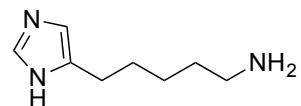

Impentamine

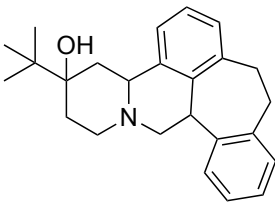

Butaclamol

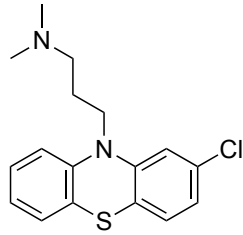

Chlorpromazine

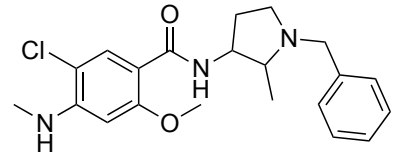

YM-9151-02

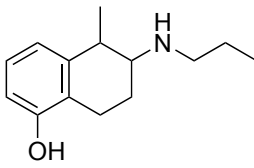

UH-232

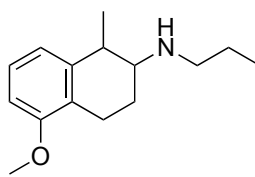

AJ-76

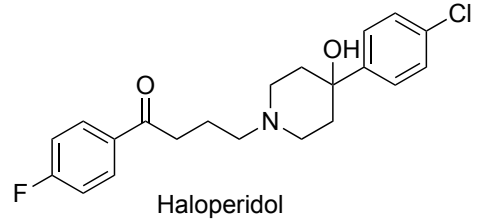

Haloperidol

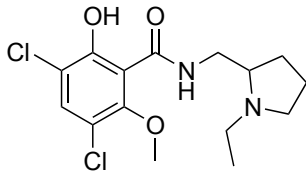

Raclopride

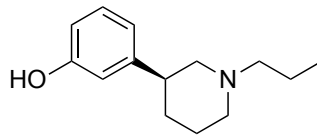

(-)-3-PPP

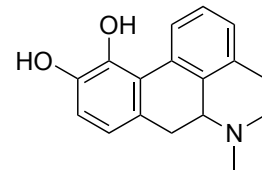

Apomorphine

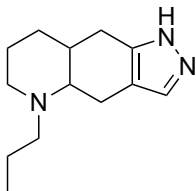

Quinpirole

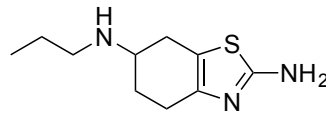

Pramipexole

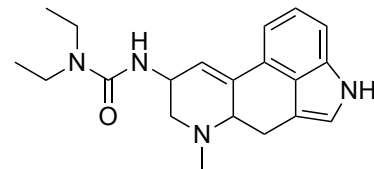

Lisuride

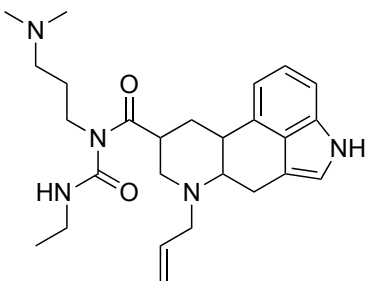

Cabergoline

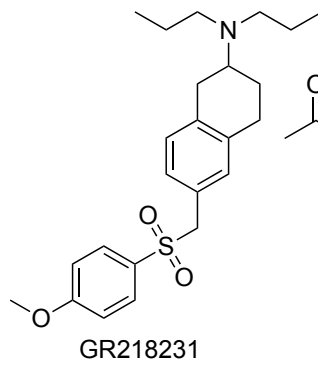

GR218231

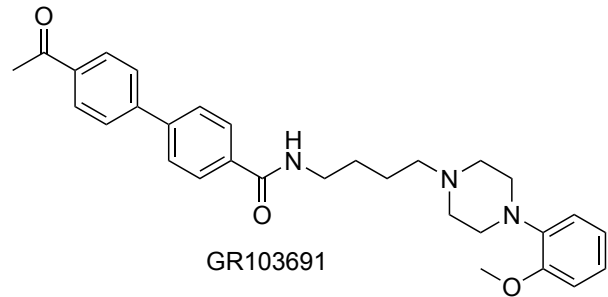

GR103691

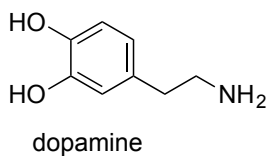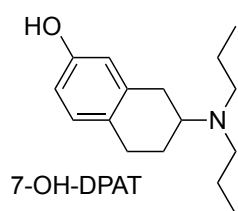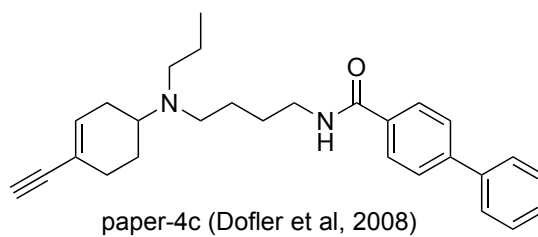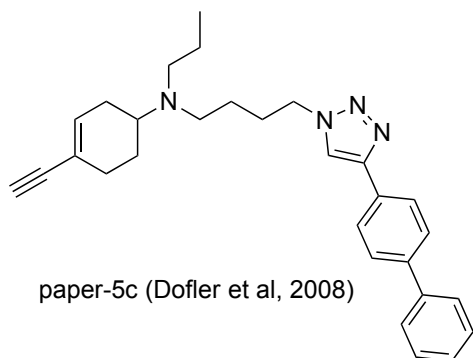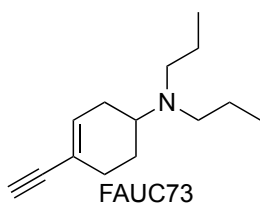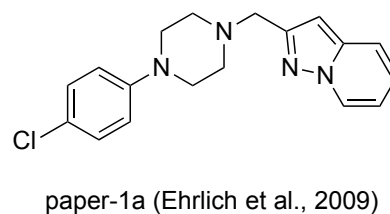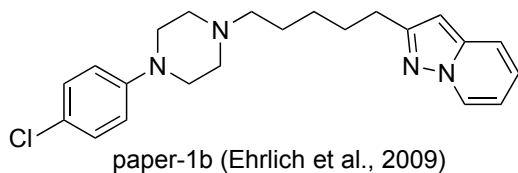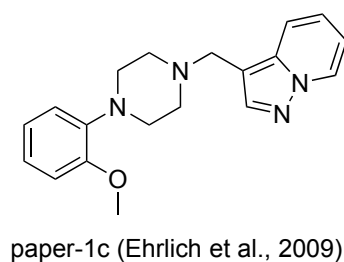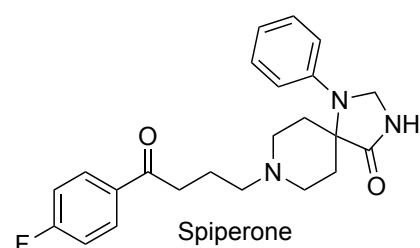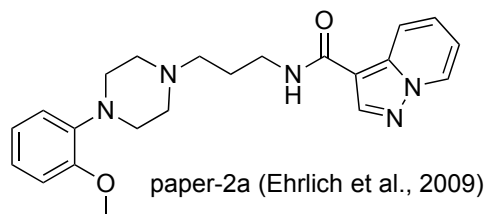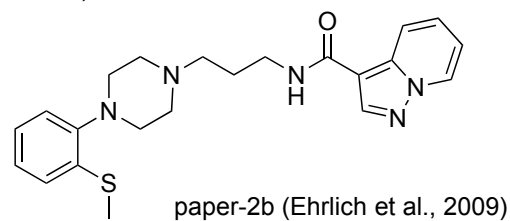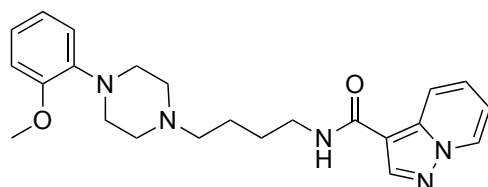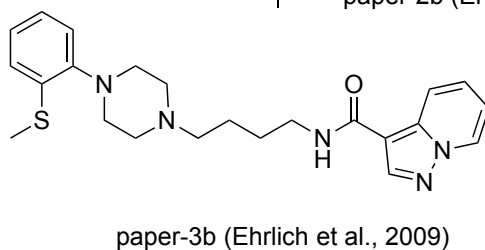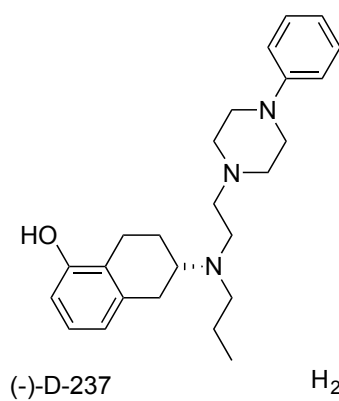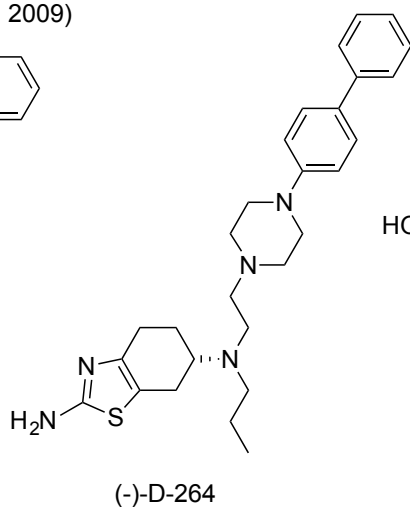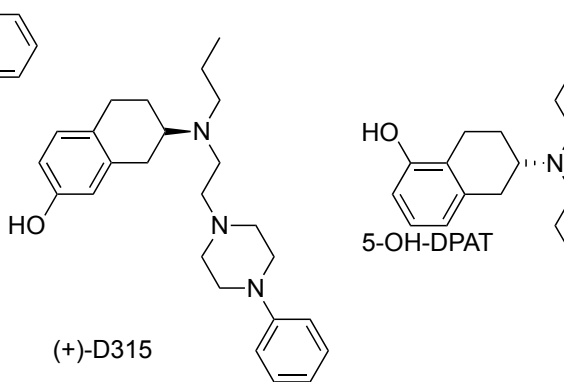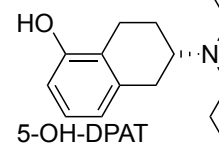



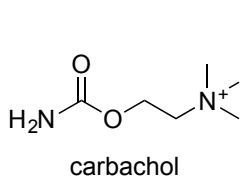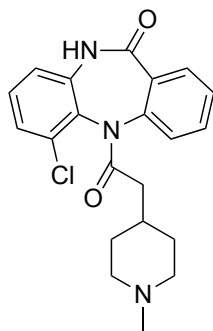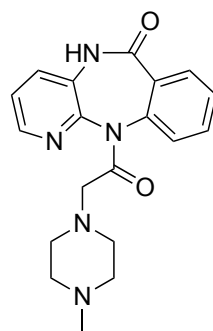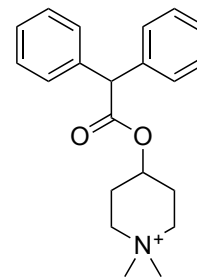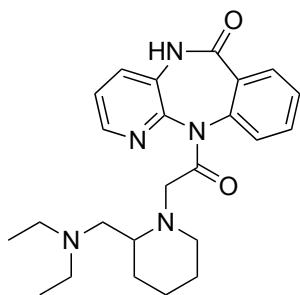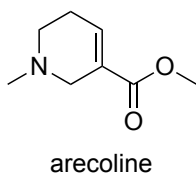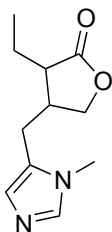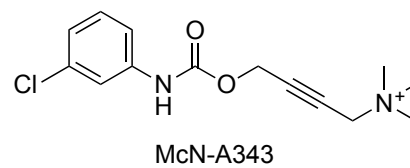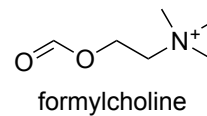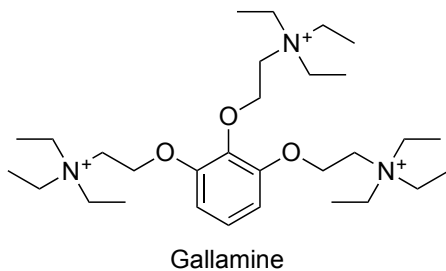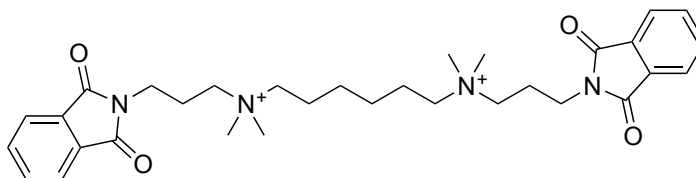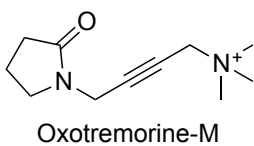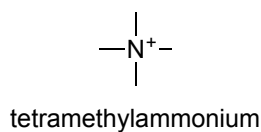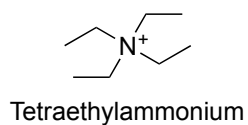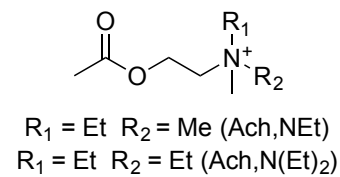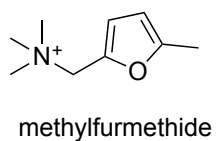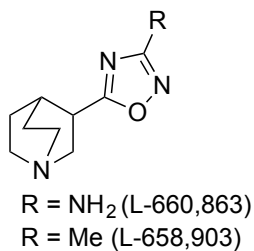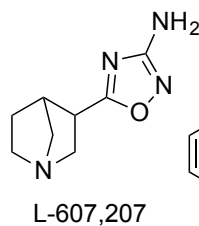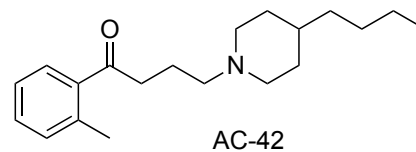

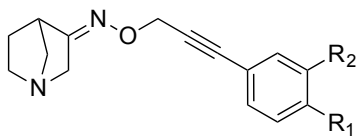

$R_1 = H$   $R_2 = H$  (Arylacetylene oxime-1)

$R_1 = MeO$   $R_2 = H$  (Arylacetylene oxime-2)

$R_1 = H$   $R_2 = MeO$  (Arylacetylene oxime-3)

$R_1 = MeO$   $R_2 = MeO$  (Arylacetylene oxime-4)

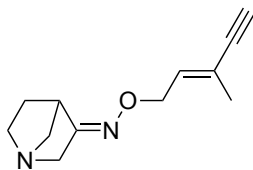

Aryl-ene-yne oxime-5

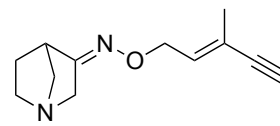

Aryl-ene-yne oxime-6

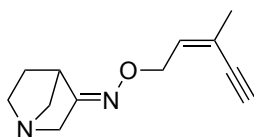

Aryl-ene-yne oxime-7

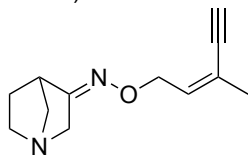

Aryl-ene-yne oxime-8

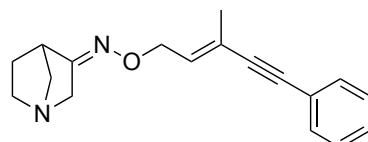

Aryl-ene-yne oxime-9

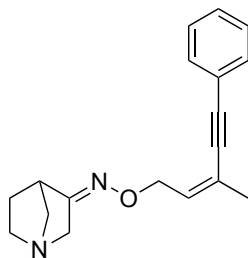

Aryl-ene-yne oxime-10

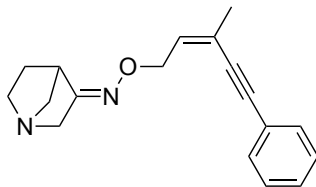

Aryl-ene-yne oxime-11

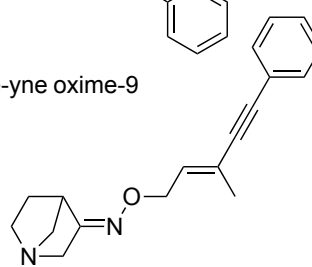

Aryl-ene-yne oxime-12

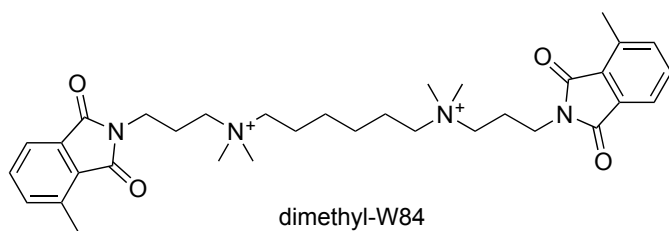

dimethyl-W84

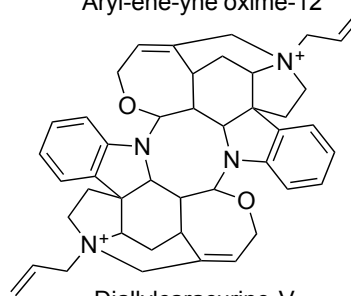

Diallylcaracurine V

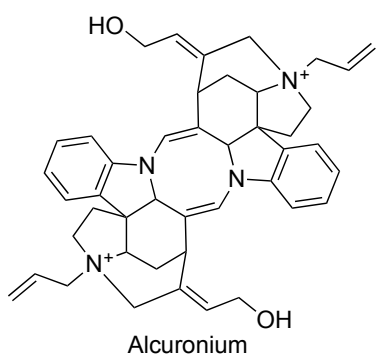

Alcuronium

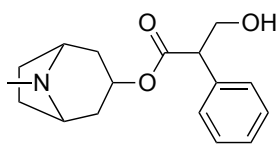

Atropine

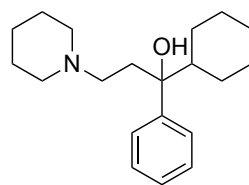

Trihexyphenidyl

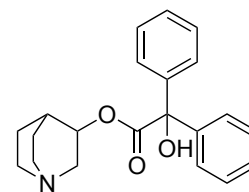

QNB/Quinuclidinyl benzylate

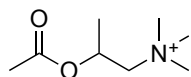

Methacholine/Mch

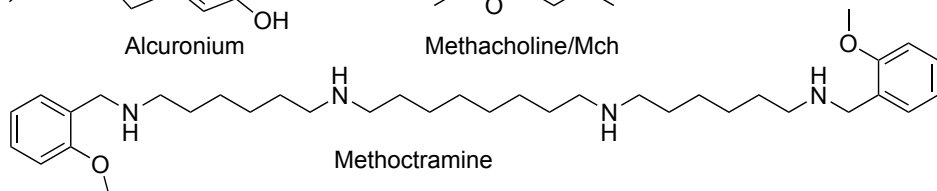

Methoctramine

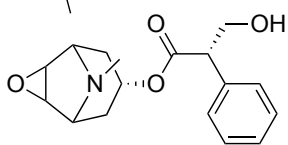

scopolamine

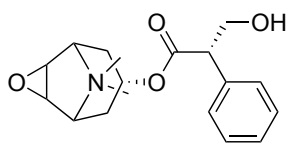

N-methylscopolamine/NMS

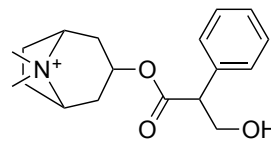

N-methylatropine

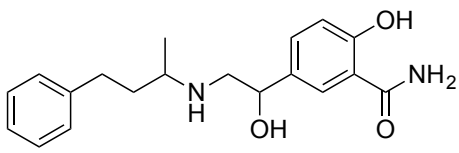

Labetalol

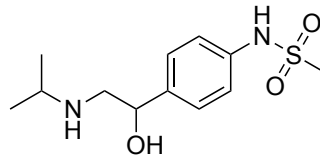

Sotalol

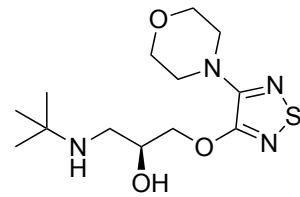

Timolol

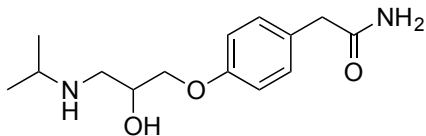

Atenolol

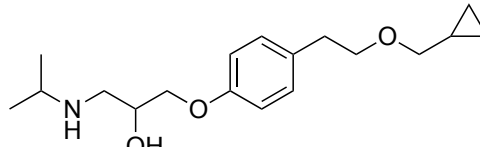

Betaxolol

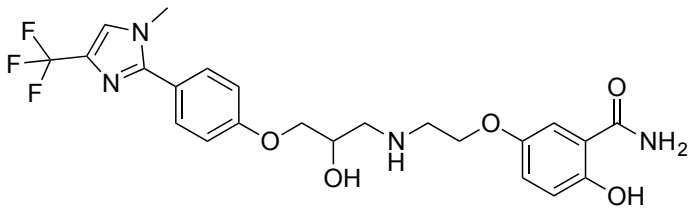

CGP20712(A)

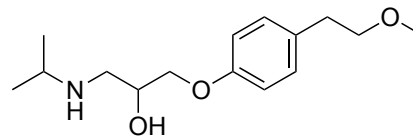

Metoprolol

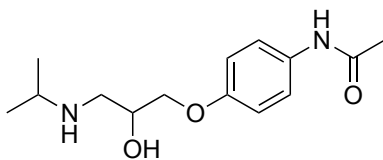

Practolol

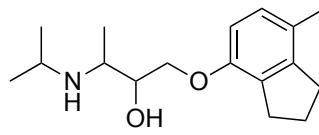

ICI118,551

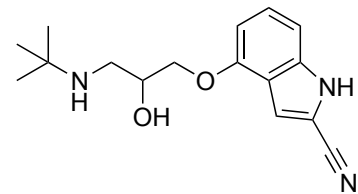

Cyanopindolol

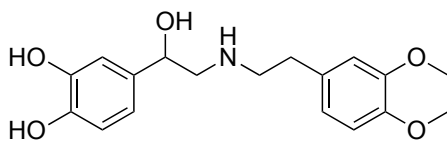

(-)-RO363

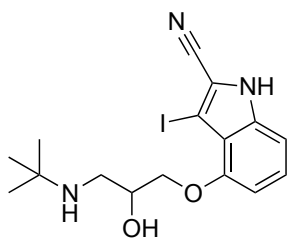

iodocyanopindolol

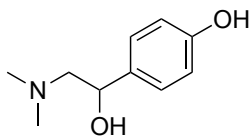

isopropyl-norsynephrine

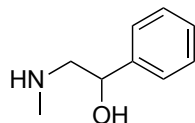

MAPE

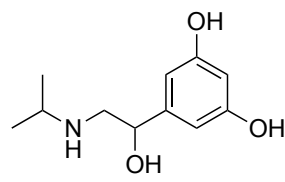

Metaproterenol

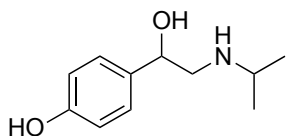

Para-hydroxyl isoprenaline

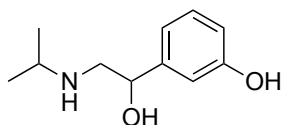

Meta-hydroxyl isoprenaline

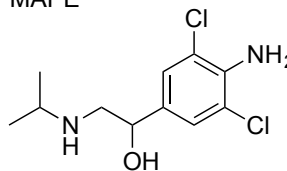

NAB 277

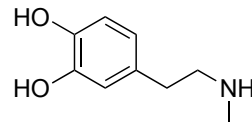

N-Methyl-Dopamine

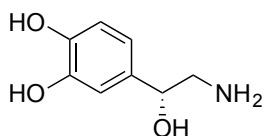

Norepinephrine

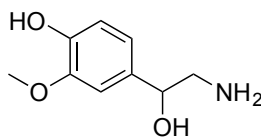

Normetanephrine

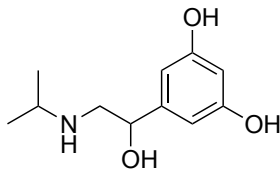

Orciprenaline

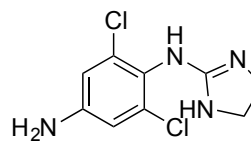

P-aminoclonidine

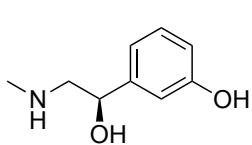

Phenylephrine

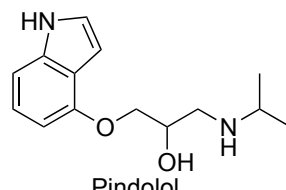

Pindolol

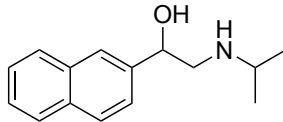

Pronethalol

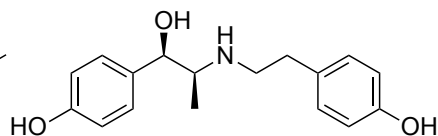

Ritodrine

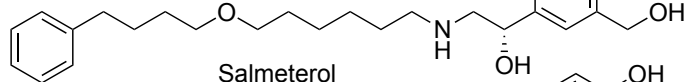

Salmeterol

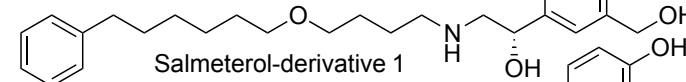

Salmeterol-derivative 1

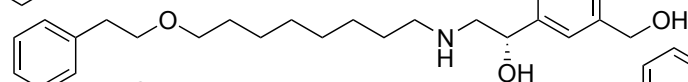

Salmeterol-derivative 2

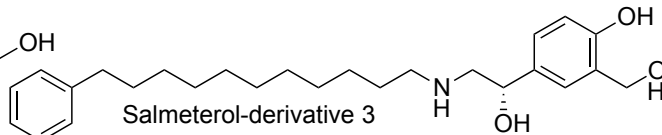

Salmeterol-derivative 3

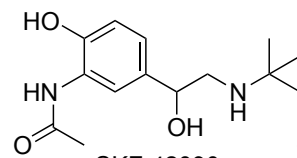

SKF 42090

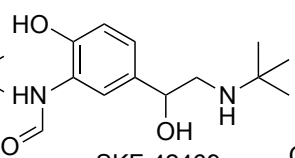

SKF 42469

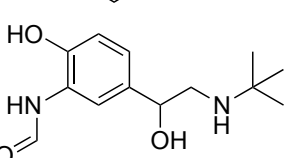

SKF 56301

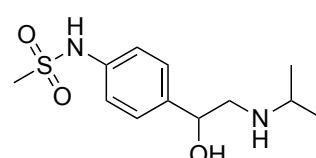

Sotalol

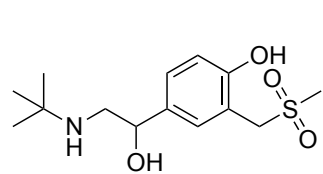

Sulfonterol

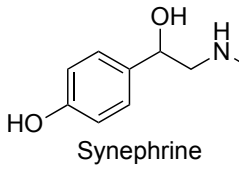

Synephrine

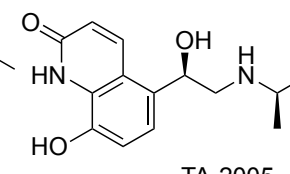

TA-2005

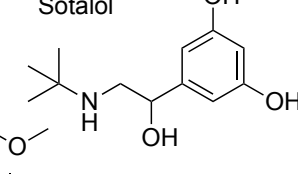

Terbutaline

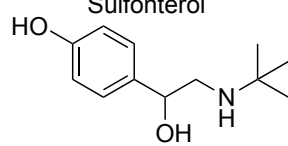

t-butyl-norsynephrine

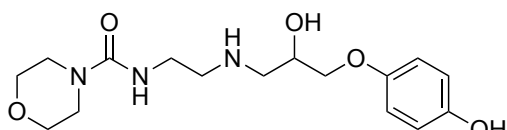

Xamoterol

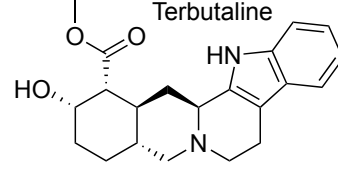

Yohimbine

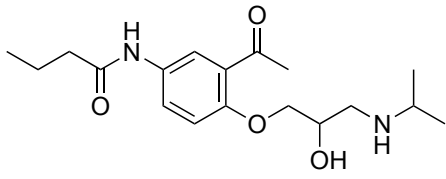

Acebutolol

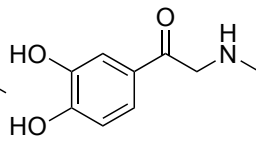

Adrenalone

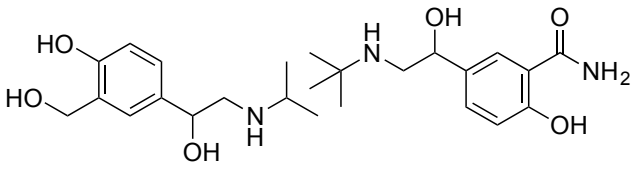

AH3021

AH3474-A

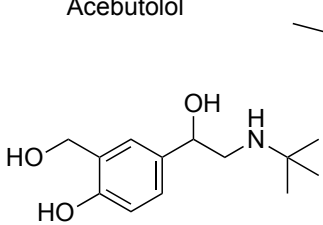

Albuterol/Salbutamol

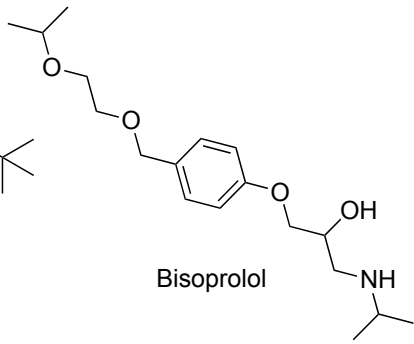

Bisoprolol

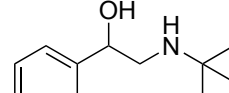

C-78

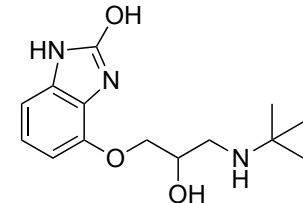

CGP-12177

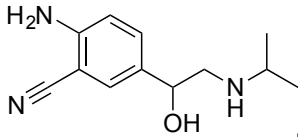

Cimaterol

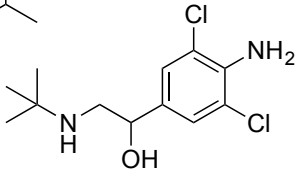

Clenbuterol

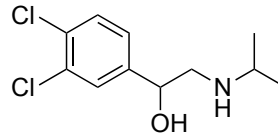

Dichloroisoproterenol

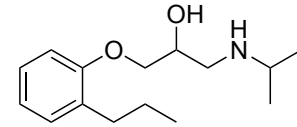

dihydroalprenolol

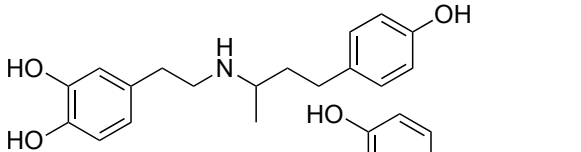

Dobutamine

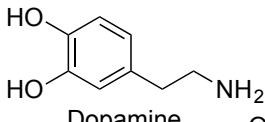

Dopamine

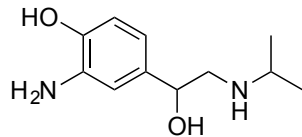

Du21117

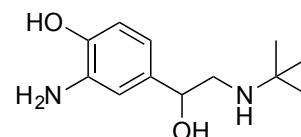

Du28663

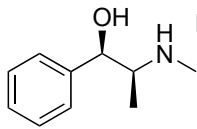

Ephedrine

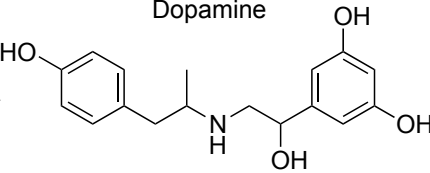

Fenoterol

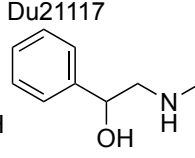

Halostachine

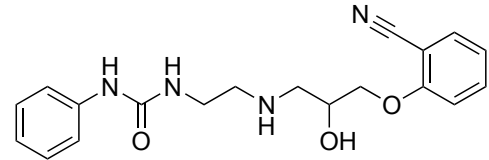

ICI-89406

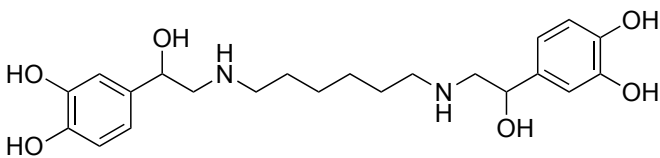

Hexoprenaline

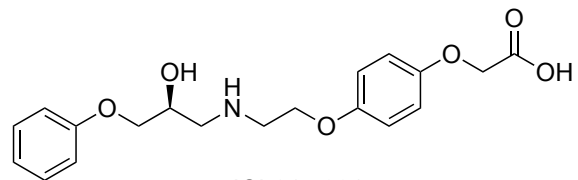

ICI-215,001

## References

Alberts GL, Pregenzer JF, Im WB (1998). Contributions of cysteine 114 of the human D3 dopamine receptor to ligand binding and sensitivity to external oxidizing agents. *Br J Pharmacol* **125**(4): 705-710.

Ambrosio C, Molinari P, Cotecchia S, Costa T (2000). Catechol-binding serines of beta(2)-adrenergic receptors control the equilibrium between active and inactive receptor states. *Mol Pharmacol* **57**(1): 198-210.

Bakker RA, Jongejan A, Sansuk K, Hacksell U, Timmerman H, Brann MR, *et al.* (2008). Constitutively active mutants of the histamine H1 receptor suggest a conserved hydrophobic asparagine-cage that constrains the activation of class A G protein-coupled receptors. *Mol Pharmacol* **73**(1): 94-103.

Bakker RA, Weiner DM, ter Laak T, Beuming T, Zuiderveld OP, Edelbroek M, *et al.* (2004). 8R-lisuride is a potent stereospecific histamine H1-receptor partial agonist. *Mol Pharmacol* **65**(3): 538-549.

Ballesteros JA, Weinstein H (1995). Integrated methods for the construction of three-dimensional models and computational probing of structure-function relations in G protein-coupled receptors. *Methods Neurosci.* **25**: 366 - 428.

Barak LS, Menard L, Ferguson SS, Colapietro AM, Caron MG (1995). The conserved seven-transmembrane sequence NP(X)2,3Y of the G-protein-coupled receptor superfamily regulates multiple properties of the beta 2-adrenergic receptor. *Biochemistry* **34**(47): 15407-15414.

Bluml K, Mutschler E, Wess J (1994a). Functional role in ligand binding and receptor activation of an asparagine residue present in the sixth transmembrane domain of all muscarinic acetylcholine receptors. *J Biol Chem* **269**(29): 18870-18876.

Bluml K, Mutschler E, Wess J (1994b). Functional role of a cytoplasmic aromatic amino acid in muscarinic receptor-mediated activation of phospholipase C. *J Biol Chem* **269**(15): 11537-11541.

Bruysters M, Jongejan A, Gillard M, van de Manakker F, Bakker RA, Chatelain P, *et al.* (2005). Pharmacological differences between human and guinea pig histamine H1 receptors: Asn84 (2.61) as key residue within an additional binding pocket in the H1 receptor. *Mol Pharmacol* **67**(4): 1045-1052.

Bruysters M, Pertz HH, Teunissen A, Bakker RA, Gillard M, Chatelain P, *et al.* (2004). Mutational analysis of the histamine H1-receptor binding pocket of histaprodifens. *Eur J Pharmacol* **487**(1-3): 55-63.

Chung FZ, Wang CD, Potter PC, Venter JC, Fraser CM (1988). Site-directed mutagenesis and continuous expression of human beta-adrenergic receptors. Identification of a conserved aspartate residue involved in agonist binding and receptor activation. *J Biol Chem* **263**(9): 4052-4055.

Cordova-Sintjago TC, Fang L, Bruysters M, Leurs R, Booth RG (2012). Journal of Chemical and Pharmaceutical Research, 2012, 4 (6): 2937-2951. *Journal of Chemical and Pharmaceutical Research* **4**(6): 2937-2951.

Dohlman HG, Caron MG, DeBlasi A, Frielle T, Lefkowitz RJ (1990). Role of extracellular disulfide-bonded cysteines in the ligand binding function of the beta 2-adrenergic receptor. *Biochemistry* **29**(9): 2335-2342.

Dorfler M, Tschammer N, Hamperl K, Hubner H, Gmeiner P (2008). Novel D3 selective dopaminergics incorporating enyne units as nonaromatic catechol bioisosteres: synthesis, bioactivity, and mutagenesis studies. *J Med Chem* **51**(21): 6829-6838.

Dowling MR, Willets JM, Budd DC, Charlton SJ, Nahorski SR, Challiss RA (2006). A single point mutation (N514Y) in the human M3 muscarinic acetylcholine receptor reveals differences in the properties of antagonists: evidence for differential inverse agonism. *J Pharmacol Exp Ther* **317**(3): 1134-1142.

Ehrlich K, Gotz A, Bollinger S, Tschammer N, Bettinetti L, Harterich S, *et al.* (2009). Dopamine D2, D3, and D4 selective phenylpiperazines as molecular probes to explore the origins of subtype specific receptor binding. *J Med Chem* **52**(15): 4923-4935.

Ellis J, Seidenberg M (2000). Site-directed mutagenesis implicates a threonine residue in TM6 in the subtype selectivities of UH-AH 37 and pirenzepine at muscarinic receptors. *Pharmacology* **61**(2): 62-69.

Fraser CM (1989). Site-directed mutagenesis of beta-adrenergic receptors. Identification of conserved cysteine residues that independently affect ligand binding and receptor activation. *J Biol Chem* **264**(16): 9266-9270.

Gabilondo AM, Hegler J, Krasel C, Boivin-Jahns V, Hein L, Lohse MJ (1997). A dileucine motif in the C terminus of the beta2-adrenergic receptor is involved in receptor internalization. *Proc Natl Acad Sci U S A* **94**(23): 12285-12290.

Gabilondo AM, Krasel C, Lohse MJ (1996). Mutations of Tyr326 in the beta 2-adrenoceptor disrupt multiple receptor functions. *Eur J Pharmacol* **307**(2): 243-250.

Gantz I, DelValle J, Wang LD, Tashiro T, Munzert G, Guo YJ, *et al.* (1992). Molecular basis for the interaction of histamine with the histamine H2 receptor. *J Biol Chem* **267**(29): 20840-20843.

Gether U, Lin S, Ghanouni P, Ballesteros JA, Weinstein H, Kobilka BK (1997). Agonists induce conformational changes in transmembrane domains III and VI of the beta2 adrenoceptor. *EMBO J* **16**(22): 6737-6747.

Ghanouni P, Schambye H, Seifert R, Lee TW, Rasmussen SG, Gether U, *et al.* (2000). The effect of pH on beta(2) adrenoceptor function. Evidence for protonation-dependent activation. *J Biol Chem* **275**(5): 3121-3127.

Gillard M, Van Der Perren C, Moguilevsky N, Massingham R, Chatelain P (2002). Binding characteristics of cetirizine and levocetirizine to human H(1) histamine receptors: contribution of Lys(191) and Thr(194). *Mol Pharmacol* **61**(2): 391-399.

Gnagey AL, Seidenberg M, Ellis J (1999). Site-directed mutagenesis reveals two epitopes involved in the subtype selectivity of the allosteric interactions of gallamine at muscarinic acetylcholine receptors. *Mol Pharmacol* **56**(6): 1245-1253.

Green SA, Cole G, Jacinto M, Innis M, Liggett SB (1993). A polymorphism of the human beta 2-adrenergic receptor within the fourth transmembrane domain alters ligand binding and functional properties of the receptor. *J Biol Chem* **268**(31): 23116-23121.

Green SA, Turki J, Innis M, Liggett SB (1994). Amino-terminal polymorphisms of the human beta 2-adrenergic receptor impart distinct agonist-promoted regulatory properties. *Biochemistry* **33**(32): 9414-9419.

Gregory KJ, Hall NE, Tobin AB, Sexton PM, Christopoulos A (2010). Identification of orthosteric and allosteric site mutations in M2 muscarinic acetylcholine receptors that contribute to ligand-selective signaling bias. *J Biol Chem* **285**(10): 7459-7474.

Heitz F, Holzwarth JA, Gies JP, Pruss RM, Trumpp-Kallmeyer S, Hibert MF, *et al.* (1999). Site-directed mutagenesis of the putative human muscarinic M2 receptor binding site. *Eur J Pharmacol* **380**(2-3): 183-195.

Huang XP, Prilla S, Mohr K, Ellis J (2005). Critical amino acid residues of the common allosteric site on the M2 muscarinic acetylcholine receptor: more similarities than differences between the structurally divergent agents gallamine and



bis(ammonio)alkane-type hexamethylene-bis-[dimethyl-(3-phthalimidopropyl)ammonium]dibromide. *Mol Pharmacol* **68**(3): 769-778.

Hulme EC, Curtis CA, Page KM, Jones PG (1995). The role of charge interactions in muscarinic agonist binding, and receptor-response coupling. *Life Sci* **56**(11-12): 891-898.

Isogaya M, Yamagiwa Y, Fujita S, Sugimoto Y, Nagao T, Kurose H (1998). Identification of a key amino acid of the beta2-adrenergic receptor for high affinity binding of salmeterol. *Mol Pharmacol* **54**(4): 616-622.

Istyastono EP, Nijmeijer S, Lim HD, van de Stolpe A, Roumen L, Kooistra AJ, *et al.* (2011). Molecular determinants of ligand binding modes in the histamine H(4) receptor: linking ligand-based three-dimensional quantitative structure-activity relationship (3D-QSAR) models to in silico guided receptor mutagenesis studies. *J Med Chem* **54**(23): 8136-8147.

Jensen AD, Guarnieri F, Rasmussen SG, Asmar F, Ballesteros JA, Gether U (2001). Agonist-induced conformational changes at the cytoplasmic side of transmembrane segment 6 in the beta 2 adrenergic receptor mapped by site-selective fluorescent labeling. *J Biol Chem* **276**(12): 9279-9290.

Jongejan A, Bruysters M, Ballesteros JA, Haaksma E, Bakker RA, Pardo L, *et al.* (2005). Linking agonist binding to histamine H1 receptor activation. *Nat Chem Biol* **1**(2): 98-103.

Jongejan A, Lim HD, Smits RA, de Esch IJ, Haaksma E, Leurs R (2008). Delineation of agonist binding to the human histamine H4 receptor using mutational analysis, homology modeling, and ab initio calculations. *J Chem Inf Model* **48**(7): 1455-1463.

Kikkawa H, Isogaya M, Nagao T, Kurose H (1998). The role of the seventh transmembrane region in high affinity binding of a beta 2-selective agonist TA-2005. *Mol Pharmacol* **53**(1): 128-134.

Kikkawa H, Kurose H, Isogaya M, Sato Y, Nagao T (1997). Differential contribution of two serine residues of wild type and constitutively active beta2-adrenoceptors to the interaction with beta2-selective agonists. *Br J Pharmacol* **121**(6): 1059-1064.

Kortagere S, Cheng SY, Antonio T, Zhen J, Reith ME, Dutta AK (2011). Interaction of novel hybrid compounds with the D3 dopamine receptor: Site-directed mutagenesis and homology modeling studies. *Biochem Pharmacol* **81**(1): 157-163.

Kostenis E, Conklin BR, Wess J (1997). Molecular basis of receptor/G protein coupling selectivity studied by coexpression of wild type and mutant m2 muscarinic receptors with mutant G alpha(q) subunits. *Biochemistry* **36**(6): 1487-1495.

Krejci A, Tucek S (2001). Changes of cooperativity between N-methylscopolamine and allosteric modulators alcuronium and gallamine induced by mutations of external loops of muscarinic M-3 receptors. *Molecular Pharmacology* **60**(4): 761-767.

Lattion A, Abuin L, Nenniger-Tosato M, Cotecchia S (1999). Constitutively active mutants of the beta1-adrenergic receptor. *FEBS Lett* **457**(3): 302-306.

Leppik RA, Lazareno S, Mynett A, Birdsall NJ (1998). Characterization of the allosteric interactions between antagonists and amiloride analogues at the human alpha2A-adrenergic receptor. *Mol Pharmacol* **53**(5): 916-925.

Leurs R, Smit MJ, Meeder R, Ter Laak AM, Timmerman H (1995). Lysine200 located in the fifth transmembrane domain of the histamine H1 receptor interacts with histamine but not with all H1 agonists. *Biochem Biophys Res Commun* **214**(1): 110-117.

Leurs R, Smit MJ, Tensen CP, Ter Laak AM, Timmerman H (1994). Site-directed mutagenesis of the histamine H1-receptor reveals a selective interaction of asparagine207 with subclasses of H1-receptor agonists. *Biochem Biophys Res Commun* **201**(1): 295-301.

Li B, Nowak NM, Kim SK, Jacobson KA, Bagheri A, Schmidt C, *et al.* (2005). Random mutagenesis of the M3 muscarinic acetylcholine receptor expressed in yeast: identification of second-site mutations that restore function to a coupling-deficient mutant M3 receptor. *J Biol Chem* **280**(7): 5664-5675.

Liapakis G, Ballesteros JA, Papachristou S, Chan WC, Chen X, Javitch JA (2000). The forgotten serine. A critical role for Ser-2035.42 in ligand binding to and activation of the beta 2-adrenergic receptor. *J Biol Chem* **275**(48): 37779-37788.

Lim HD, de Graaf C, Jiang W, Sadek P, McGovern PM, Istyastono EP, *et al.* (2010). Molecular determinants of ligand binding to H4R species variants. *Mol Pharmacol* **77**(5): 734-743.

Lim HD, Jongejan A, Bakker RA, Haaksma E, de Esch IJ, Leurs R (2008). Phenylalanine 169 in the second extracellular loop of the human histamine H4 receptor is responsible for the difference in agonist binding between human and mouse H4 receptors. *J Pharmacol Exp Ther* **327**(1): 88-96.

Lundstrom K, Turpin MP (1996). Proposed schizophrenia-related gene polymorphism: expression of the Ser9Gly mutant human dopamine D3 receptor with the Semliki Forest virus system. *Biochem Biophys Res Commun* **225**(3): 1068-1072.

Lundstrom K, Turpin MP, Large C, Robertson G, Thomas P, Lewell XQ (1998). Mapping of dopamine D3 receptor binding site by pharmacological characterization of mutants expressed in CHO cells with the Semliki Forest virus system. *J Recept Signal Transduct Res* **18**(2-3): 133-150.

Mason DA, Moore JD, Green SA, Liggett SB (1999). A gain-of-function polymorphism in a G-protein coupling domain of the human beta1-adrenergic receptor. *J Biol Chem* **274**(18): 12670-12674.

McMillin SM, Heusel M, Liu T, Costanzi S, Wess J (2011). Structural basis of M3 muscarinic receptor dimer/oligomer formation. *J Biol Chem* **286**(32): 28584-28598.

Moffett S, Adam L, Bonin H, Loisel TP, Bouvier M, Mouillac B (1996). Palmitoylated cysteine 341 modulates phosphorylation of the beta2-adrenergic receptor by the cAMP-dependent protein kinase. *J Biol Chem* **271**(35): 21490-21497.

Moffett S, Mouillac B, Bonin H, Bouvier M (1993). Altered phosphorylation and desensitization patterns of a human beta 2-adrenergic receptor lacking the palmitoylated Cys341. *EMBO J* **12**(1): 349-356.

Moguilevsky N, Varsalona F, Guillaume JP, Noyer M, Gillard M, Daliers J, *et al.* (1995). Pharmacological and functional characterisation of the wild-type and site-directed mutants of the human H1 histamine receptor stably expressed in CHO cells. *J Recept Signal Transduct Res* **15**(1-4): 91-102.

Nijmeijer S, Engelhardt H, Schultes S, van de Stolpe AC, Lusink V, de Graaf C, *et al.* (2013). Design and pharmacological characterization of VUF14480, a covalent partial agonist that interacts with cysteine 98(3.36) of the human histamine H(4) receptor. *British journal of pharmacology*.

Nonaka H, Otaki S, Ohshima E, Kono M, Kase H, Ohta K, *et al.* (1998). Unique binding pocket for KW-4679 in the histamine H1 receptor. *Eur J Pharmacol* **345**(1): 111-117.

Ohta K, Hayashi H, Mizuguchi H, Kagamiyama H, Fujimoto K, Fukui H (1994). Site-directed mutagenesis of the histamine H1 receptor: roles of aspartic acid107, asparagine198 and threonine194. *Biochem Biophys Res Commun* **203**(2): 1096-1101.

Page KM, Curtis CA, Jones PG, Hulme EC (1995). The functional role of the binding site aspartate in muscarinic acetylcholine receptors, probed by site-directed mutagenesis. *Eur J Pharmacol* **289**(3): 429-437.

Rasmussen SG, Jensen AD, Liapakis G, Ghanouni P, Javitch JA, Gether U (1999). Mutation of a highly conserved aspartic acid in the beta2 adrenergic receptor: constitutive activation, structural instability, and conformational rearrangement of transmembrane segment 6. *Mol Pharmacol* **56**(1): 175-184.

Sartania N, Strange PG (1999). Role of conserved serine residues in the interaction of agonists with D3 dopamine receptors. *J Neurochem* **72**(6): 2621-2624.

Sato T, Kobayashi H, Nagao T, Kurose H (1999). Ser203 as well as Ser204 and Ser207 in fifth transmembrane domain of the human beta2-adrenoceptor contributes to agonist binding and receptor activation. *Br J Pharmacol* **128**(2): 272-274.

Scarselli M, Li B, Kim SK, Wess J (2007). Multiple residues in the second extracellular loop are critical for M3 muscarinic acetylcholine receptor activation. *J Biol Chem* **282**(10): 7385-7396.

Schmidt C, Li B, Bloodworth L, Erlenbach I, Zeng FY, Wess J (2003). Random mutagenesis of the M3 muscarinic acetylcholine receptor expressed in yeast. Identification of point mutations that "silence" a constitutively active mutant M3 receptor and greatly impair receptor/G protein coupling. *J Biol Chem* **278**(32): 30248-30260.

Schultes S, Nijmeijer S, Engelhardt H, Kooistra AJ, Vischer HF, de Esch IJP, *et al.* (2012). Mapping histamine H4 receptor-ligand binding modes. *Medchemcomm* **4**: 193-204.

Schwarz RD, Spencer CJ, Jaen JC, Mirzadegan T, Moreland D, Tecle H, *et al.* (1995). Mutations of aspartate 103 in the Hm2 receptor and alterations in receptor binding properties of muscarinic agonists. *Life Sci* **56**(11-12): 923-929.

Seifert R, Wenzel-Seifert K, Burckstummer T, Pertz HH, Schunack W, Dove S, *et al.* (2003). Multiple differences in agonist and antagonist pharmacology between human and guinea pig histamine H1-receptor. *J Pharmacol Exp Ther* **305**(3): 1104-1115.

Shin N, Coates E, Murgolo NJ, Morse KL, Bayne M, Strader CD, *et al.* (2002). Molecular modeling and site-specific mutagenesis of the histamine-binding site of the histamine H4 receptor. *Mol Pharmacol* **62**(1): 38-47.

Stewart GD, Sexton PM, Christopoulos A (2010). Prediction of functionally selective allosteric interactions at an M3 muscarinic acetylcholine receptor mutant using *Saccharomyces cerevisiae*. *Mol Pharmacol* **78**(2): 205-214.

Sugimoto Y, Fujisawa R, Tanimura R, Lattion AL, Cotecchia S, Tsujimoto G, *et al.* (2002). Beta(1)-selective agonist (-)-1-(3,4-dimethoxyphenethylamino)-3-(3,4-dihydroxy)-2-propanol [(-)-RO363] differentially interacts with key amino acids responsible for beta(1)-selective binding in resting and active states. *J Pharmacol Exp Ther* **301**(1): 51-58.

Suryanarayana S, Kobilka BK (1993). Amino acid substitutions at position 312 in the seventh hydrophobic segment of the beta 2-adrenergic receptor modify ligand-binding specificity. *Mol Pharmacol* **44**(1): 111-114.

Uveges AJ, Kowal D, Zhang Y, Spangler TB, Dunlop J, Semus S, *et al.* (2002). The role of transmembrane helix 5 in agonist binding to the human H3 receptor. *J Pharmacol Exp Ther* **301**(2): 451-458.

Valiquette M, Bonin H, Bouvier M (1993). Mutation of tyrosine-350 impairs the coupling of the beta 2-adrenergic receptor to the stimulatory guanine nucleotide binding protein without interfering with receptor down-regulation. *Biochemistry* **32**(19): 4979-4985.

Wess J, Gdula D, Brann MR (1991). Site-directed mutagenesis of the m3 muscarinic receptor: identification of a series of threonine and tyrosine residues involved in agonist but not antagonist binding. *EMBO J* **10**(12): 3729-3734.

Wess J, Nanavati S, Vogel Z, Maggio R (1993). Functional role of proline and tryptophan residues highly conserved among G protein-coupled receptors studied by mutational analysis of the m3 muscarinic receptor. *EMBO J* **12**(1): 331-338.

Wieland K, Laak AM, Smit MJ, Kuhne R, Timmerman H, Leurs R (1999). Mutational analysis of the antagonist-binding site of the histamine H(1) receptor. *J Biol Chem* **274**(42): 29994-30000.

Wieland K, Zuurmond HM, Krasel C, Ijzerman AP, Lohse MJ (1996). Involvement of Asn-293 in stereospecific agonist recognition and in activation of the beta 2-adrenergic receptor. *Proc Natl Acad Sci U S A* **93**(17): 9276-9281.

Yang J, Logsdon CD, Johansen TE, Williams JA (1993). Human m3 muscarinic acetylcholine receptor carboxyl-terminal threonine residues are required for agonist-induced receptor down-regulation. *Mol Pharmacol* **44**(6): 1158-1164.

Yao BB, Hutchins CW, Carr TL, Cassar S, Masters JN, Bennani YL, *et al.* (2003). Molecular modeling and pharmacological analysis of species-related histamine H(3) receptor heterogeneity. *Neuropharmacology* **44**(6): 773-786.

Zuscik MJ, Porter JE, Gaivin R, Perez DM (1998). Identification of a conserved switch residue responsible for selective constitutive activation of the beta2-adrenergic receptor. *J Biol Chem* **273**(6): 3401-3407.
